# Supplementary material for: The search for the most stable structures of silicon–carbon monolayer compounds
Source: Royal Society of Chemistry journal article supplement (doi:10.1039/c4nr03247k), 2014-01-01
Supplement: c4nr03247k1.pdf [file c4nr03247k1.pdf]

### Electronic Supplementary information

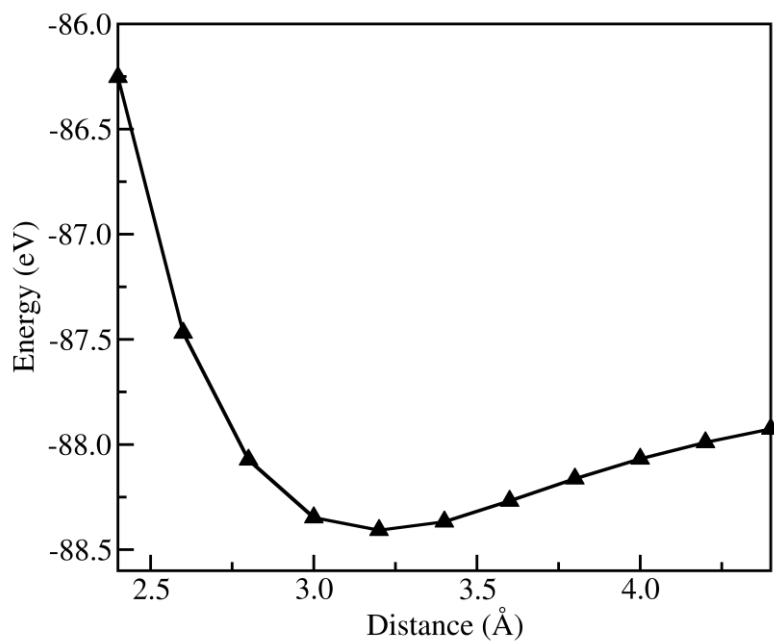

**Figure S1.** Computed total energy per supercell versus the distance of Si-Si between two parallel stacked (in registry)  $\text{Si}_2\text{C}_3\text{-I}$  monolayers. The minimum (corresponding to Si-Si distance) is close to 3.4Å.
